# Supplementary material
Source: PubMed Central journal article supplement (PMC4074223)
Supplement: supp_139.9.1670_DEV075440TableS1.pdf [file supp_139.9.1670_DEV075440TableS1.pdf]

**Table S1.**

| <b>Allele/RNAi</b>   | <b>Marker</b> | <b>Gonad appearance by Hoechst</b>                         | <b>Centrioles in diakinetoc oocytes</b> |
|----------------------|---------------|------------------------------------------------------------|-----------------------------------------|
| <i>mpk-1(oz140)</i>  | SAS-4         | pachytene arrest                                           | NA                                      |
| <i>mpk-1(ga111)</i>  | SAS-4         | mildly disorganized                                        | absent                                  |
| <i>let-60(ga89)</i>  | SAS-4         | disorganized                                               | absent                                  |
| <i>gld-1(RNAi)</i>   | SAS-4         | mitotic re-entry                                           | NA                                      |
| <i>mex-5(RNAi)</i>   | SAS-4         | wt                                                         | absent                                  |
| <i>ced-3(n717)</i>   | SAS-4         | wt                                                         | absent                                  |
| <i>car-1(tm1753)</i> | SAS-4         | wt                                                         | absent                                  |
| <i>ani-2(RNAi)</i>   | SAS-4         | occasional premature cellularization                       | absent, no premature elimination        |
| <i>lgg-1(RNAi)</i>   | IFA-1         | wt                                                         | absent                                  |
| <i>bec-1(RNAi)</i>   | IFA-1         | wt                                                         | absent                                  |
| <i>let-512(RNAi)</i> | IFA-1         | wt                                                         | absent                                  |
| <i>unc-51(RNAi)</i>  | IFA-1         | wt                                                         | absent                                  |
| <i>atg-9(RNAi)</i>   | IFA-1         | wt                                                         | absent                                  |
| <i>pas-1(RNAi)</i>   | SAS-4         | wt, partial arrest in metaphase of meiosis I in the embryo | absent                                  |
| <i>pas-2(RNAi)</i>   | SAS-4         | wt, partial arrest in metaphase of meiosis I in the embryo | absent                                  |
| <i>pas-6(RNAi)</i>   | SAS-4         | wt, partial arrest in metaphase of meiosis I in the embryo | absent                                  |
| <i>pbs-1(RNAi)</i>   | SAS-4         | wt, arrest in metaphase of meiosis I in the embryo         | absent                                  |
| <i>daz-1(tj3)</i>    | SAS-4         | disorganized, sterile                                      | absent                                  |
| <i>syp-1(me17)</i>   | SAS-4         | wt                                                         | absent                                  |
| <i>rpn-2(RNAi)</i>   | SAS-4         | wt, arrest in metaphase of meiosis I in the embryo         | absent                                  |
| <i>rpn-3(RNAi)</i>   | SAS-4         | wt, arrest in metaphase of meiosis I in the embryo         | absent                                  |
| <i>rpt-3(RNAi)</i>   | SAS-4         | wt, arrest in metaphase of meiosis I in the embryo         | absent                                  |

wt, wild type

NA, not applicable
