# Supplementary material
Source: PubMed Central journal article supplement (PMC4074223)

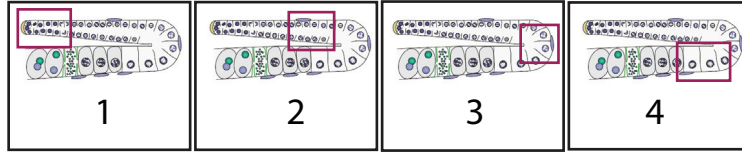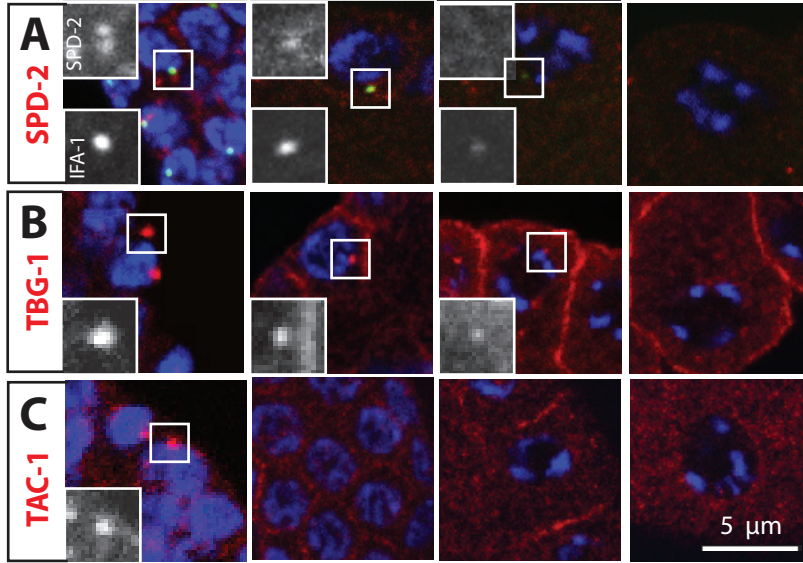

Supplement: supp_139.9.1670_DEV075440FigS1.pdf [file supp_139.9.1670_DEV075440FigS1.pdf]

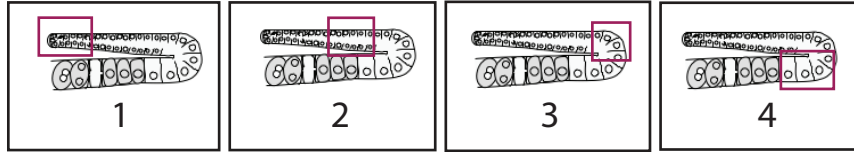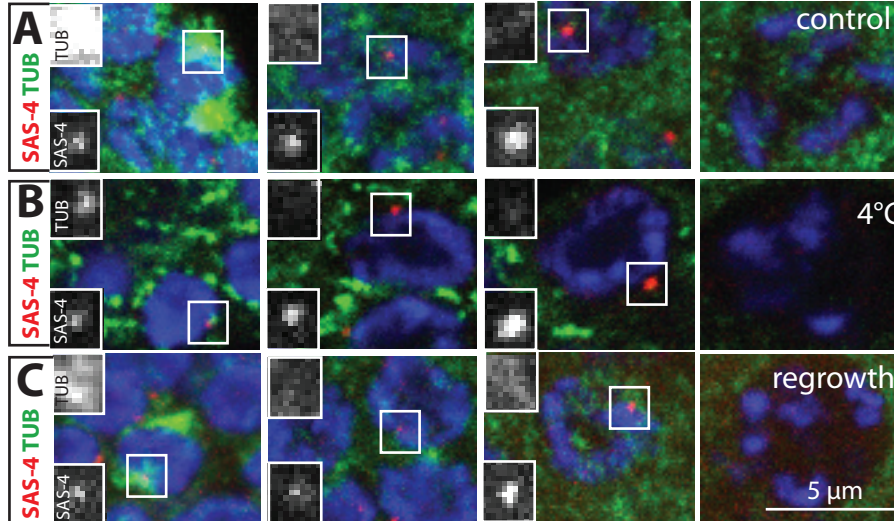

Supplement: supp_139.9.1670_DEV075440FigS2.pdf [file supp_139.9.1670_DEV075440FigS2.pdf]

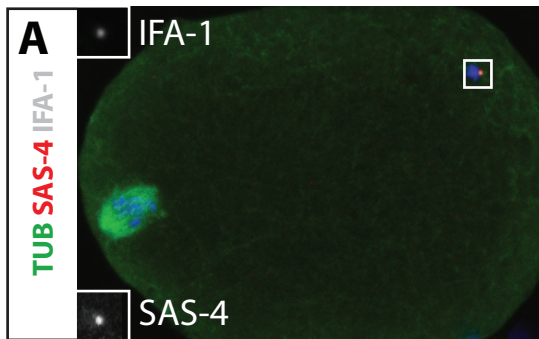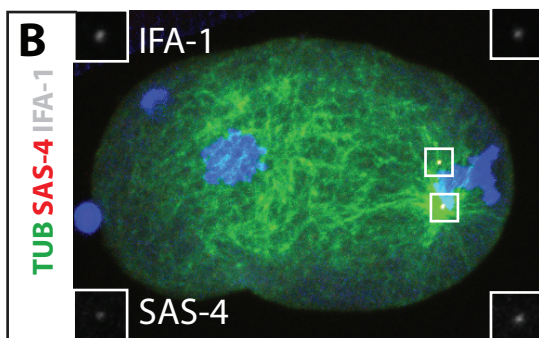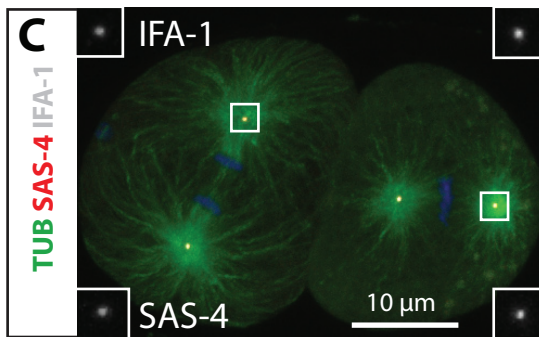

Supplement: supp_139.9.1670_DEV075440FigS3.pdf [file supp_139.9.1670_DEV075440FigS3.pdf]

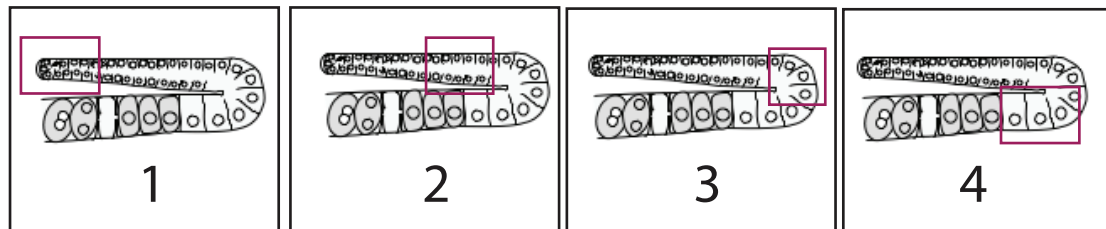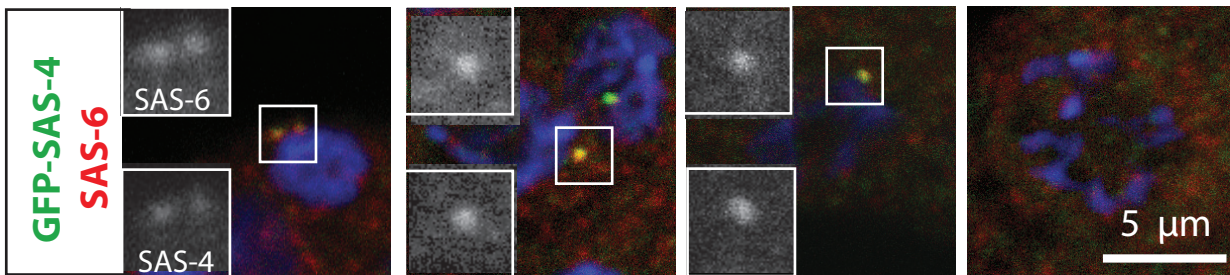

Supplement: supp_139.9.1670_DEV075440FigS4.pdf [file supp_139.9.1670_DEV075440FigS4.pdf]

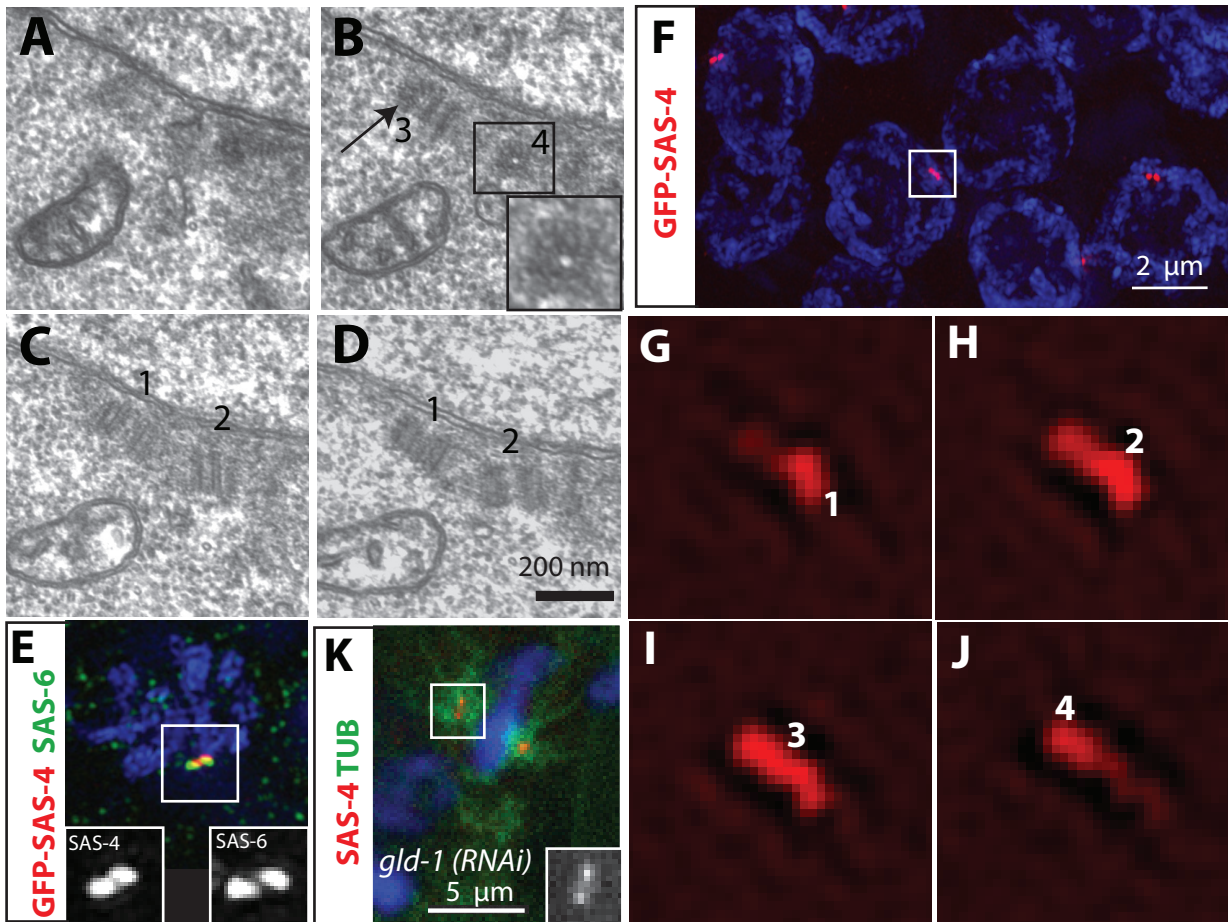

Supplement: supp_139.9.1670_DEV075440FigS5.pdf [file supp_139.9.1670_DEV075440FigS5.pdf]

Cellularization  
(old)

Elimination  
(old)

Cellularization  
(young)

Elimination  
(young)

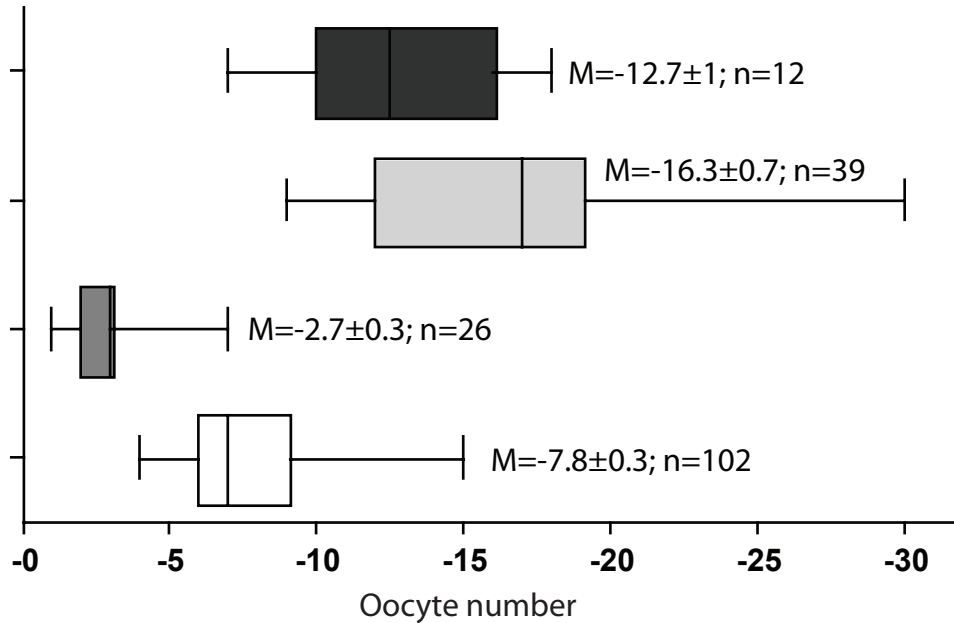

Supplement: supp_139.9.1670_DEV075440FigS6.pdf [file supp_139.9.1670_DEV075440FigS6.pdf]

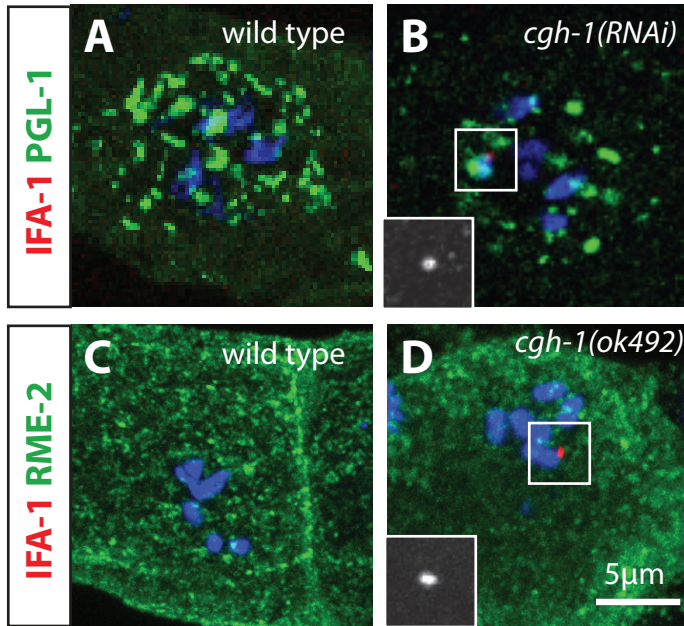

Supplement: supp_139.9.1670_DEV075440FigS7.pdf [file supp_139.9.1670_DEV075440FigS7.pdf]
